# Supplementary material
Source: PubMed Central journal article supplement (PMC2837556)
Supplement: NIHMS162228-supplement-supplement_1.pdf [file NIHMS162228-supplement-supplement_1.pdf]

Supplemental Table 1

*Reward-related Brain Function during a Monetary Reward Paradigm for Each Developmental Group, by Task Condition*

| Region                           | Hemi-<br>sphere | Coordinates |     |     | Cluster<br>Size | <i>t</i>                    | Region                | Hemi-<br>sphere | Coordinates |    |    | Cluster<br>Size | <i>t</i> | Region                    | Hemi-<br>sphere | Coordinates |    |    | Cluster<br>Size | <i>t</i> |
|----------------------------------|-----------------|-------------|-----|-----|-----------------|-----------------------------|-----------------------|-----------------|-------------|----|----|-----------------|----------|---------------------------|-----------------|-------------|----|----|-----------------|----------|
|                                  |                 | x           | y   | z   |                 |                             |                       |                 | x           | y  | z  |                 |          |                           |                 | x           | y  | z  |                 |          |
| <b>Reward Anticipation</b>       |                 |             |     |     |                 |                             |                       |                 |             |    |    |                 |          |                           |                 |             |    |    |                 |          |
| <b>Pre/Early Adolescents</b>     |                 |             |     |     |                 | <b>Mid/Late Adolescents</b> |                       |                 |             |    |    | <b>Adults</b>   |          |                           |                 |             |    |    |                 |          |
| <b>Striatum</b>                  |                 |             |     |     |                 |                             |                       |                 |             |    |    |                 |          |                           |                 |             |    |    |                 |          |
| Caudate                          | L,R             | 6           | 12  | 12  | 769             | 6.81                        | Caudate               | R               | 4           | 14 | 5  | 592             | 6.71     | Caudate                   | L,R             | -14         | 21 | 1  | 1424            | 6.29     |
| Caudate                          | R               | 22          | -34 | 16  | 179             | 5.21                        |                       |                 |             |    |    |                 |          |                           |                 |             |    |    |                 |          |
| <b>Medial Prefrontal Cortex</b>  |                 |             |     |     |                 |                             |                       |                 |             |    |    |                 |          |                           |                 |             |    |    |                 |          |
|                                  |                 |             |     |     |                 |                             |                       |                 |             |    |    |                 |          | mPFC                      | L,R             | 10          | 43 | 48 | 1441            | 5.98     |
| <b>Lateral Prefrontal Cortex</b> |                 |             |     |     |                 |                             |                       |                 |             |    |    |                 |          |                           |                 |             |    |    |                 |          |
| DLPFC                            | R               | 55          | 26  | 19  | 571             | 5.54                        | DLPFC; mPFC;<br>VLPFC | L,R             | -55         | 18 | 19 | 8254            | 8.51     | Superior<br>Frontal Gyrus | R               | 42          | 20 | 47 | 471             | 6.88     |
| Middle Frontal<br>Gyrus; DLPFC   | L               | -36         | 7   | 55  | 535             | 5.14                        |                       |                 |             |    |    |                 |          | Middle<br>Frontal Gyrus   | L               | -46         | 46 | -6 | 106             | 5.40     |
| Inferior Frontal<br>Gyrus        | L               | -48         | 27  | -10 | 163             | 4.52                        |                       |                 |             |    |    |                 |          | DLPFC                     | R               | 26          | 56 | 27 | 101             | 5.15     |
| Middle Frontal<br>Gyrus          | L               | -46         | 45  | 5   | 44              | 3.78                        |                       |                 |             |    |    |                 |          | VLPFC                     | R               | 48          | 48 | -6 | 17              | 4.14     |
|                                  |                 |             |     |     |                 |                             |                       |                 |             |    |    |                 |          | DLPFC                     | L               | -55         | 19 | 1  | 10              | 4.14     |

| <b>Orbitofrontal Cortex</b> |   |     |     |     |     |      |                                                                                                |   |     |     |     |      |      |                         |   |     |     |     |     |      |
|-----------------------------|---|-----|-----|-----|-----|------|------------------------------------------------------------------------------------------------|---|-----|-----|-----|------|------|-------------------------|---|-----|-----|-----|-----|------|
| Orbitofrontal Cortex        | R | 34  | 40  | -14 | 34  | 4.18 |                                                                                                |   |     |     |     |      |      |                         |   |     |     |     |     |      |
| <b>Temporal Lobe</b>        |   |     |     |     |     |      |                                                                                                |   |     |     |     |      |      |                         |   |     |     |     |     |      |
| Middle Temporal Gyrus       | L | -59 | -35 | 2   | 552 | 5.07 | Middle Temporal Gyrus                                                                          | L | -55 | -37 | 2   | 485  | 5.44 | Fusiform Gyrus          | R | 28  | -74 | -10 | 455 |      |
| Amygdala                    | R | 32  | -7  | -20 | 47  | 4.50 | Parahippocampal Gyrus                                                                          | R | 12  | -5  | -17 | 126  | 4.32 | Hippocampus             | R | 30  | -43 | 4   | 86  |      |
| Inferior Temporal Gyrus     | L | 51  | -70 | 0   | 53  | 4.31 | Parahippocampal Gyrus                                                                          | R | 20  | -20 | -11 | 141  | 3.80 | Hippocampus             | L | -30 | -39 | -3  | 99  |      |
|                             |   |     |     |     |     |      | Parahippocampal Gyrus                                                                          | L | -16 | -5  | -18 | 17   | 3.50 | Fusiform Gyrus          | L | -44 | -55 | -16 | 405 |      |
|                             |   |     |     |     |     |      |                                                                                                |   |     |     |     |      |      | Parahippocampal Gyrus   | R | 14  | -3  | -15 | 15  | 4.46 |
|                             |   |     |     |     |     |      |                                                                                                |   |     |     |     |      |      | Superior Temporal Gyrus | R | 44  | 17  | -16 | 74  | 4.11 |
| <b>Parietal Lobe</b>        |   |     |     |     |     |      |                                                                                                |   |     |     |     |      |      |                         |   |     |     |     |     |      |
| Superior Parietal Lobule    | R | 30  | -73 | 48  | 63  | 4.63 | Superior Parietal Lobule; Inferior Parietal Lobule; Superior Temporal Gyrus; Precuneus; Cuneus | L | -36 | -63 | 51  | 1370 | 6.94 | Precuneus               | R | 4   | -72 | 42  | 320 | 6.32 |



| Reward Outcome                              |     |     |     |     |      |      |                                                 |   |     |     |     |      |      |                               |     |     |    |     |      |      |
|---------------------------------------------|-----|-----|-----|-----|------|------|-------------------------------------------------|---|-----|-----|-----|------|------|-------------------------------|-----|-----|----|-----|------|------|
| <b>Striatum</b>                             |     |     |     |     |      |      |                                                 |   |     |     |     |      |      |                               |     |     |    |     |      |      |
| Caudate                                     | L,R | -8  | -1  | 17  | 4194 | 6.96 | Caudate/Culmen<br>(Cerebellum)                  | R | 2   | -39 | -3  | 6008 | 7.07 | Caudate                       | L,R | 16  | -7 | 24  | 1094 | 7.09 |
| <b>Medial Prefrontal Cortex</b>             |     |     |     |     |      |      |                                                 |   |     |     |     |      |      |                               |     |     |    |     |      |      |
| Anterior<br>Cingulate                       |     | 0   | 35  | -3  | 26   | 4.00 | Anterior<br>Cingulate                           | R | 4   | 46  | -4  | 91   | 3.61 | mPFC                          | L,R | 0   | 60 | 25  | 461  | 6.92 |
| <b>Lateral Prefrontal Cortex</b>            |     |     |     |     |      |      |                                                 |   |     |     |     |      |      |                               |     |     |    |     |      |      |
| VLDFC; DLPFC;<br>Superior<br>Temporal Gyrus | R   | 48  | 23  | -10 | 614  | 6.90 | Middle Frontal<br>Gyrus; mPFC;<br>DLPFC         | L | -51 | 10  | 38  | 1545 | 6.55 | VLDFC                         | R   | 55  | 16 | -1  | 59   | 5.81 |
| Inferior Frontal<br>Gyrus                   | L   | -51 | 17  | -3  | 402  | 6.36 | DLPFC                                           | R | 51  | 21  | 34  | 2273 | 6.19 | Superior<br>Frontal Gyrus     | R   | 32  | 28 | 48  | 202  | 5.42 |
| Inferior Frontal<br>Gyrus                   | L   | -38 | 7   | 55  | 62   | 5.76 | Inferior Frontal<br>Gyrus                       | L | -48 | 41  | 3   | 95   | 3.64 | Middle Frontal<br>Gyrus       | L   | -32 | 7  | 57  | 63   | 4.80 |
| DLPFC                                       | R   | 48  | 32  | 21  | 236  | 3.82 |                                                 |   |     |     |     |      |      | DLPFC                         | L   | -57 | 16 | 1   | 15   | 4.21 |
| Middle Frontal<br>Gyrus                     | R   | 50  | 14  | 38  | 34   | 3.76 |                                                 |   |     |     |     |      |      | DLPFC                         | R   | 24  | 65 | 12  | 78   | 4.04 |
|                                             |     |     |     |     |      |      |                                                 |   |     |     |     |      |      | DLPFC                         | L   | -30 | 61 | 8   | 24   | 3.95 |
| <b>Temporal Lobe</b>                        |     |     |     |     |      |      |                                                 |   |     |     |     |      |      |                               |     |     |    |     |      |      |
| Middle Temporal<br>Gyrus                    | L   | -63 | -50 | 4   | 796  | 5.40 | Fusiform Gyrus                                  | R | 50  | -49 | -14 | 483  | 5.97 | Superior<br>Temporal<br>Gyrus | L   | -40 | 9  | -16 | 212  | 6.16 |
| Middle Temporal<br>Gyrus                    | R   | 61  | -39 | -1  | 463  | 4.91 | Superior<br>Temporal Gyrus;<br>Inferior Frontal | R | 38  | 11  | -17 | 803  | 5.96 | Middle<br>Temporal<br>Gyrus   | L   | -42 | -2 | -8  | 91   | 5.48 |

|                          |   |     |     |    |    |      |                                                    |   |     |     |     |     |      |                          |   |     |     |     |     |      |
|--------------------------|---|-----|-----|----|----|------|----------------------------------------------------|---|-----|-----|-----|-----|------|--------------------------|---|-----|-----|-----|-----|------|
|                          |   |     |     |    |    |      | Gyrus                                              |   |     |     |     |     |      |                          |   |     |     |     |     |      |
| Superior Temporal Gyrus  | R | 59  | -53 | 19 | 21 | 4.16 | Inferioer Temporal Gyrus                           | L | -51 | -57 | -11 | 126 | 5.08 | Hippocampus              | R | 30  | -45 | 2   | 79  | 4.34 |
| Parahippocampal Gyrus    | R | 24  | -20 | -7 | 59 | 3.49 | Parahippocampal Gyrus                              | R | 12  | -5  | -17 | 31  | 4.31 | Fusiform Gyrus           | L | -48 | -45 | -13 | 118 | 4.24 |
|                          |   |     |     |    |    |      | Middle Temporal Gyrus                              | L | -63 | -41 | 4   | 129 | 3.69 | Middle Temporal Gyrus    | R | 55  | -51 | -11 | 65  | 4.23 |
|                          |   |     |     |    |    |      |                                                    |   |     |     |     |     |      | Superior Temporal Gyrus  | R | 46  | 13  | -14 | 84  | 4.07 |
| <b>Parietal Lobe</b>     |   |     |     |    |    |      |                                                    |   |     |     |     |     |      |                          |   |     |     |     |     |      |
| Inferior Parietal Lobule | R | 50  | -40 | 55 | 23 | 3.88 | Inferior Parietal Lobule; Superior Parietal Lobule | R | 47  | -44 | 54  | 743 | 5.60 | Precuneus                | R | 4   | -72 | 42  | 153 | 5.13 |
|                          |   |     |     |    |    |      | Superior Parietal Lobe                             | L | -32 | -63 | 53  | 579 | 4.75 | Inferior Parietal Lobule | L | -55 | -36 | 48  | 246 | 5.02 |
| <b>Occipital Lobe</b>    |   |     |     |    |    |      |                                                    |   |     |     |     |     |      |                          |   |     |     |     |     |      |
| Lingual Gyrus            | L | -16 | -64 | -7 | 20 | 4.22 |                                                    |   |     |     |     |     |      |                          |   |     |     |     |     |      |
| <b>Other</b>             |   |     |     |    |    |      |                                                    |   |     |     |     |     |      |                          |   |     |     |     |     |      |
|                          |   |     |     |    |    |      | Pons                                               | L | -2  | -15 | -21 | 22  | 5.16 | Culmen (Cerebellum)      | R | 6   | -46 | 4   | 561 | 4.89 |

*Note:* Results are from whole-brain analyses with  $p < .001$ , minimum extent of 10 voxels, and correction within functionally defined clusters using false discovery rate. For large clusters including multiple regions, all regions are listed, with the region containing the maximum voxel listed first.

Adolescent groups were determined by physical development, with Tanner breast/genital score of 1 or 2 for the pre/early pubertal group and 3, 4, or

5 for the mid/late pubertal group.  $df=25$  for pre/early, 50 for mid/late, 18 for adult. All  $p < .001$ . DLPFC: dorsolateral prefrontal cortex; mPFC: medial prefrontal cortex; VLPFC: ventrolateral prefrontal cortex.

## Supplemental Table 2

*Whole-Brain Results for Response to Monetary Reward in Entire Sample of Adolescents and Adults, by Task Condition*

| Region                                                                              | Hemisphere | Talairach coordinates of<br>maximum voxel in<br>cluster |     |    | Cluster<br>size | <i>t</i> | <i>p</i> < |
|-------------------------------------------------------------------------------------|------------|---------------------------------------------------------|-----|----|-----------------|----------|------------|
|                                                                                     |            | x                                                       | y   | z  |                 |          |            |
| Reward Anticipation                                                                 |            |                                                         |     |    |                 |          |            |
| Middle Occipital Gyrus, BA18,<br>19; Cuneus, BA 17, 18; Lingual<br>Gyrus, BA17, 18  | L,R        | 26                                                      | -91 | 16 | 8053            | 10.56    | 0.001      |
| Middle Frontal Gyrus, BA6;<br>DLPFC, BA46, 45, 47; mPFC,<br>BA8, 32                 | L,R        | -40                                                     | 7   | 53 | 6475            | 9.20     | 0.001      |
| DLPFC, BA 45; Middle Temporal<br>Gyrus, BA 21, 22                                   | L          | -57                                                     | 37  | 2  | 757             | 6.95     | 0.001      |
| Precuneus, BA7; Superior Parietal<br>Lobule, BA7; Inferior Parietal<br>Lobule, BA40 | L,R        | 4                                                       | -70 | 42 | 1456            | 6.72     | 0.001      |
| Middle Temporal Gyrus, BA 21,<br>22                                                 | R          | 61                                                      | -39 | -1 | 424             | 6.05     | 0.001      |
| Caudate                                                                             | L          | -20                                                     | -34 | 16 | 350             | 5.71     | 0.001      |

|                                                                                    |     |     |     |     |      |      |       |
|------------------------------------------------------------------------------------|-----|-----|-----|-----|------|------|-------|
| Supramarginal Gyrus, BA40                                                          | R   | 53  | -52 | 32  | 198  | 4.54 | 0.001 |
| Caudate                                                                            | R   | 14  | -5  | 17  | 62   | 3.92 | 0.001 |
| Midbrain, Mammillary Body                                                          |     | 0   | -15 | -19 | 15   | 3.79 | 0.001 |
| Medial Frontal Gyrus, BA11                                                         | R   | 2   | 50  | -16 | 40   | 3.75 | 0.001 |
| Parahippocampal Gyrus, BA34                                                        | L   | -16 | -5  | -18 | 14   | 3.60 | 0.001 |
| Hippocampus                                                                        | L   | -32 | -9  | -20 | 12   | 3.49 | 0.001 |
| Middle Frontal Gyrus, BA11                                                         | R   | 22  | 28  | -15 | 11   | 3.35 | 0.005 |
| Cingulate Gyrus, BA23                                                              | R   | 2   | -33 | 29  | 72   | 3.31 | 0.005 |
| Superior Temporal Gyrus, BA22                                                      | L   | -46 | -4  | -7  | 10   | 3.06 | 0.005 |
| Reward Outcome                                                                     |     |     |     |     |      |      |       |
| Thalamus/Caudate                                                                   | R,L | 4   | 0   | 9   | 6839 | 8.93 | 0.001 |
| Inferior Frontal Gyrus, BA47;<br>DLPFC, BA45, 47; Superior<br>Temporal Gyrus, BA38 | R   | 55  | 19  | -1  | 2239 | 7.26 | 0.001 |
| Precentral Gyrus, BA44; DLPFC:<br>BA 9, 44, 46, 47; Middle Frontal<br>Gyrus, BA6   | L   | -46 | 13  | 11  | 1643 | 7.02 | 0.001 |
| Middle Temporal Gyrus. BA 37,<br>21, 22                                            | R   | 60  | -49 | -6  | 516  | 6.53 | 0.001 |
| Inferior Parietal Lobule, BA40                                                     | R   | 50  | -40 | 54  | 307  | 6.45 | 0.001 |
| Middle Occipital Gyrus, BA37                                                       | L   | -52 | -64 | -7  | 508  | 5.74 | 0.001 |
| Superior Parietal Lobule, BA7                                                      | L   | -30 | -63 | 53  | 427  | 4.98 | 0.001 |
| Cingulate Gyrus, BA31                                                              | R   | 2   | -36 | 26  | 144  | 4.60 | 0.001 |



|                               |   |     |     |     |     |      |       |
|-------------------------------|---|-----|-----|-----|-----|------|-------|
| Inferior Temporal Gyrus, BA20 | R | 50  | -51 | -13 | 11  | 4.28 | 0.001 |
| Amygdala                      | R | 34  | -7  | -20 | 20  | 3.88 | 0.001 |
| Superior Temporal Gyrus, BA39 | L | -54 | -60 | 29  | 14  | 3.25 | 0.005 |
| mPFC, BA32                    |   | 0   | 43  | 5   | 114 | 3.21 | 0.005 |
| Mammillary Body               |   | 0   | -14 | -14 | 10  | 3.15 | 0.005 |

*Note:* Analyses were conducted with a false discovery rate correction at  $p < .05$  and extent of 10 voxels. BA: Brodmann Area; DLPFC: dorsolateral prefrontal cortex; mPFC: medial prefrontal cortex.
